# Supplementary material for: Proteomics and molecular network analyses reveal that the interaction between the TAT–DCF1 peptide and TAF6 induces an antitumor effect in glioma cells
Source: Royal Society of Chemistry journal article supplement (doi:10.1039/c9mo00068b), 2020-01-03
Supplement: c9mo00068b1.pdf [file c9mo00068b1.pdf]

## Supplemental Information

### Proteomics and Molecular Network Analyses Reveal that the Interaction between the TAT-DCF1 Peptide and TAF6 Induces an Antitumor Effect in Glioma Cells

Jiao Wang<sup>a</sup>, Fushuai Wang<sup>a</sup>, Qian Li<sup>a</sup>, Qian Wang<sup>a</sup>, Jie Li<sup>a</sup>, Yajiang Wang<sup>a</sup>, Jiamin Sun<sup>b</sup>,  
Dongfang Lu<sup>b</sup>, Hong Zhou<sup>a</sup>, Shiman Li<sup>a</sup>, Sujuan Ma<sup>c</sup>, Jiang Xie<sup>b,\*</sup>, Tieqiao Wen<sup>a,\*</sup>

Table S1

| Project                                  | Contents                                                                       |
|------------------------------------------|--------------------------------------------------------------------------------|
| Data Acquisition Software                | Thermo Xcalibur 4.0 (Thermo, USA)                                              |
| Reversed phase column information        | C18 column (75 $\mu$ m x 25cm, Thermo, USA)                                    |
| Chromatography instrument                | EASY-nLC 1200                                                                  |
| Mass Spectrometer                        | Q-Exactive (Thermo, USA)                                                       |
| Chromatographic separation time          | 90min      A : 2% ACNwith 0.1% formic acid<br>B: 80% ACN with 0.1% formic acid |
| Flow rate                                | 300nL/min                                                                      |
| Gradient [Time(min)/B(%)]                | 0/2,70/40,70.1/90,75/90,75.1/2,90/2                                            |
| MS scan range (m/z)                      | 350-1300                                                                       |
| Acquisition mode                         | DDA                                                                            |
| First-order mass spectrometry resolution | 7000                                                                           |
| Fragmentation mode                       | HCD                                                                            |
| Secondary resolution                     | 17500                                                                          |

**Table S1. Liquid chromatography tandem mass spectrometry parameters****Table S2**

| Gene name     | Primer sequence (5' to 3')                                                   |
|---------------|------------------------------------------------------------------------------|
| <i>DCF1</i>   | Upstream : CCTACCCCTTGCACACCTAC<br>Downstream : GGGACATGAGTTGTTCTTGTCTC      |
| <i>TAF6</i>   | Upstream : GCACATGGGGAAACGACAGAA<br>Downstream : CTTCAAGGCGTAGTCAATGTCA      |
| <i>RPS27A</i> | Upstream : CTCGAGGTTGAACCCTCGGA<br>Downstream : CTGATCAGGAGGAATTCCTTCC       |
| <i>TRAF6</i>  | Upstream : CATAGCCCTGGATTCTACAC<br>Downstream : TCTCCTTGCATTGTGTGGAC         |
| <i>HMGB1</i>  | Upstream : AAGAAGTGCTCAGAGAGGTGGAAG<br>Downstream : GAAGAAGGCCGAAGGAGGCCTCTT |
| <i>HMGB2</i>  | Upstream : CGGGGCAAATGTCCTCGTA<br>Downstream : GCAGACATGGTCTTCCATCTCTC       |
| <i>TOP2</i>   | Upstream : TGGCTGTGGTATTGTAGAAAGC<br>Downstream : TTGGCATCATCGAGTTTGGGA      |
| <i>GAPDH</i>  | Upstream : TCACCACCATGGAGAAGGC<br>Downstream : GCTAAGCAGTTGGTGGTGCA          |

**Table S2. List of the primers used for qPCR**

**Table S3**

| Function                                                            | <i>P</i> -value        | Genes in the predicted signaling network                                                                                                                                                                                                                                                                    |
|---------------------------------------------------------------------|------------------------|-------------------------------------------------------------------------------------------------------------------------------------------------------------------------------------------------------------------------------------------------------------------------------------------------------------|
| <u>SRP-dependent cotranslational protein targeting to membrane</u>  | $8.89 \times 10^{-40}$ | <i>RPL18, RPL17, RPL14, RPL15, RPS15A, RPLP2, RPL36, RPS2, RPS3, RPS25, RPL30, RPL7, RPL32, RPL31, RPS3A, RPLP0, RPL34, RPL8, FAU, RPL10A, RPL7A, RPS20, RPL12, RPS21, RPS24, RPSA, RPL24, RPL23A, RPS8, RPL29, RPS18, RPS19, RPS16, RPL18A, RPL22, RPL13A, RPS14, RPS10, UBA52</i>                         |
| <u>translational initiation</u>                                     | $1.34 \times 10^{-36}$ | <i>RPL18, RPL17, RPL14, RPL15, RPS15A, RPLP2, RPL36, RPS2, RPS3, RPS25, RPL30, RPL7, RPL32, RPS3A, RPL31, RPLP0, RPL34, EIF1AY, RPL8, FAU, RPL10A, RPL7A, RPS20, RPL12, RPS21, RPS24, RPSA, RPL24, RPL23A, RPS8, RPL29, RPS18, RPS19, RPS16, RPL18A, RPL22, RPL13A, RPS14, EIF2S1, EIF4A1, RPS10, UBA52</i> |
| viral transcription                                                 | $2.49 \times 10^{-36}$ | <i>RPL18, RPL17, RPL14, RPL15, RPS15A, RPLP2, RPL36, RPS2, RPS3, RPS25, RPL30, RPL7, RPL32, RPL31, RPS3A, RPLP0, RPL34, RPL8, FAU, RPL10A, RPL7A, RPS20, RPL12, RPS21, RPS24, RPSA, RPL24, RPL23A, RPS8, RPL29, RPS18, RPS19, RPS16, RPL18A, RPL22, RPL13A, RPS14, RPS10, UBA52</i>                         |
| nuclear-transcribed mRNA catabolic process, nonsense-mediated decay | $3.52 \times 10^{-35}$ | <i>RPL18, RPL17, RPL14, RPL15, RPS15A, RPLP2, RPL36, RPS2, RPS3, RPS25, RPL30, RPL7, RPL32, RPL31, RPS3A, RPLP0, RPL34, RPL8, FAU, RPL10A, RPL7A, RPS20, RPL12, RPS21, RPS24, RPSA, RPL24, RPL23A, RPS8, RPL29, RPS18, RPS19, RPS16, RPL18A, RPL22, RPL13A, RPS14, RPS10, UBA52</i>                         |

|                                                      |                        |                                                                                                                                                                                                                                                                                                                                                                                                                                                                                                                                                                                                                                                                                                                                                                                                                                                                                                                                                |
|------------------------------------------------------|------------------------|------------------------------------------------------------------------------------------------------------------------------------------------------------------------------------------------------------------------------------------------------------------------------------------------------------------------------------------------------------------------------------------------------------------------------------------------------------------------------------------------------------------------------------------------------------------------------------------------------------------------------------------------------------------------------------------------------------------------------------------------------------------------------------------------------------------------------------------------------------------------------------------------------------------------------------------------|
| translation                                          | $3.23 \times 10^{-26}$ | <p><i>RPL18, RPL17, RPL14, RPL15, RPS15A, RPLP2, RPL36, RPS2, RPS3, RPS25, RPL30, RPL7, RPL32, RPL31, RPS3A, RPLP0, RPL34, RPL8, SLC25A3, FAU, RPL10A, RPL7A, RPS20, RPL12, RPS21, RPS24, RPSA, SLC25A5, RRBP1, SLC25A6, RPL24, RPL23A, RPS8, RPL29, RPS18, RPS19, RPS16, RPL18A, RPL22, RPL13A, RPS14, RPS10, UBA52</i></p> <p><i>RPL18, RPL17, RPL14, RPL15, RPS15A, RPLP2, RPL36, RPS2, RPS3, RPS25, RPL30, RPL7, RPL32, RPL31, RPS3A, RPLP0, RPL34, RPL8, FAU, RPL10A, RPL7A, RPS20, RPL12, RPS21, RPS24, RPSA, RPL24, RPL23A, RPS8, RPL29, RPS18, PA2G4, RPS19, RPS16, RPL18A, RPL22, RPL13A, RPS14, RPS10, UBA52</i></p> <p><i>HSP90ABI, RPL14, CHMP4B, RPL15, CAPZA1, HIFX, RDX, RPS2, CAPZB, PRDX1, PKM, RACK1, CTTN, HNRNPK, MACF1, RPL34, LRRC59, RANBP1, HSPA5, RPL7A, HSPA8, AHNAK, ENO1, BSG, RAN, FSCN1, RPL24, RPL23A, EEF2, FLNB, YWHAE, ANXA2, RPL29, EVPL, SERBP1, SPTBN2, TMOD3, EEFIG, SPTBN1, DBN1, PUF60, SPTANI</i></p> |
| rRNA processing                                      | $5.80 \times 10^{-26}$ | <p><i>ACTB, CAPZA1, VIM, TPM1, CAPZB, TPM4, ACTG1, ACTR3, ARPC1B, ACTR2, TUBB, ARPC3, ARPC2, TXN, RAC1, MSN, TUBB4B</i></p>                                                                                                                                                                                                                                                                                                                                                                                                                                                                                                                                                                                                                                                                                                                                                                                                                    |
| cell-cell adhesion                                   | $5.23 \times 10^{-24}$ | <p><i>ATP5B, ATP5F1, ATP5C1, STOML2, ATP5O, ATP5A1, ATP5I, COX5B, ATP5H, ATP5J</i></p>                                                                                                                                                                                                                                                                                                                                                                                                                                                                                                                                                                                                                                                                                                                                                                                                                                                         |
| movement of cell or subcellular component            | $1.79 \times 10^{-11}$ | <p><i>RPL7, RPL22, RPL31, RPLP0, RPL15, RPL8, RPL36, RPLP2, RPL29</i></p>                                                                                                                                                                                                                                                                                                                                                                                                                                                                                                                                                                                                                                                                                                                                                                                                                                                                      |
| mitochondrial ATP synthesis coupled proton transport | $1.36 \times 10^{-10}$ |                                                                                                                                                                                                                                                                                                                                                                                                                                                                                                                                                                                                                                                                                                                                                                                                                                                                                                                                                |
| cytoplasmic translation                              | $2.28 \times 10^{-8}$  |                                                                                                                                                                                                                                                                                                                                                                                                                                                                                                                                                                                                                                                                                                                                                                                                                                                                                                                                                |

|                                                              |                       |                                                                                                                                        |
|--------------------------------------------------------------|-----------------------|----------------------------------------------------------------------------------------------------------------------------------------|
| ATP biosynthetic process                                     | $8.43 \times 10^{-8}$ | <i>PKM, ATP5B, ATP5F1, ATP5C1, ATP5O, ATP5A1, ATP5I, ATP5H, ATP5J</i>                                                                  |
| protein folding                                              | $1.82 \times 10^{-7}$ | <i>HSP90AB1, TMX1, HSP90AA1, GNAI3, GNAI2, PDIA3, PDIA6, LMAN1, CANX, TRAP1, HSP90B1, GNB2, PPIA, TXN, HSPE1, DNAJA3, HSPA8, HSPA9</i> |
| ATP synthesis coupled proton transport                       | $1.86 \times 10^{-7}$ | <i>ATP5B, ATP5F1, ATP5C1, ATP6V0A1, ATP5O, ATP5A1, ATP5H, ATP5J</i>                                                                    |
| cytoskeleton organization                                    | $1.15 \times 10^{-6}$ | <i>ACTB, CAPZB, TPM1, MAST3, KRT5, MACF1, KRT16, CFL1, AVIL, SPTBN2, SPTBN1, MSN, DST, TUBA1C, SPTAN1, TUBB4B</i>                      |
| ephrin receptor signaling pathway                            | $1.41 \times 10^{-6}$ | <i>ACTB, ACTR3, ACTG1, CDC42, ACTR2, ARPC1B, ARPC3, ARPC2, RAC1, RHOA, MYL12A, YES1</i>                                                |
| Arp2/3 complex-mediated actin nucleation                     | $4.00 \times 10^{-6}$ | <i>ACTR3, ACTR2, ARPC1B, ARPC3, ARPC2, ARPC5L, ARPC4-TLL3</i>                                                                          |
| protein stabilization                                        | $4.48 \times 10^{-6}$ | <i>HSP90AB1, HSP90AA1, ATP1B3, FLOT2, PHB, CLU, NAA16, HSPA1B, FLNA, PPIB, PHB2, HSPD1, GAPDH, DNAJA3</i>                              |
| leukocyte migration                                          | $7.78 \times 10^{-6}$ | <i>CD47, SLC16A1, BSG, KRAS, ATP1B3, PROCR, PPIA, CD58, SHC1, MSN, MYH9, YES1, MIF</i>                                                 |
| Fc-gamma receptor signaling pathway involved in phagocytosis | $1.18 \times 10^{-5}$ | <i>ACTB, HSP90AB1, HSP90AA1, MYO1C, ACTG1, ACTR3, ACTR2, ARPC1B, CDC42, ARPC3, ARPC2, RAC1, YES1</i>                                   |
| hydrogen ion transmembrane transport                         | $3.27 \times 10^{-5}$ | <i>COX7A2, UQCRC1, UQCRH, COX6B1, COX4I1, COX7A2L, COX5A, COX6C, UQCRB</i>                                                             |
| mitochondrial electron transport, cytochrome c to oxygen     | $4.22 \times 10^{-5}$ | <i>COX6B1, COX4I1, COX7A2L, COX5A, COX5B, COX6C</i>                                                                                    |

|                                                                    |                       |                                                                                                                                          |
|--------------------------------------------------------------------|-----------------------|------------------------------------------------------------------------------------------------------------------------------------------|
| viral process                                                      | $4.75 \times 10^{-5}$ | <i>SLC25A5, RAN, VIM, HNRNPA1, YWHAE, VDAC1, RACK1, SET, HNRNPK, C1QBP, CENPA, NPM1, EIF4A1, RHOA, RANBP1, SHC1, HSPD1, RAB6A, HSPA8</i> |
| gene expression                                                    | $5.09 \times 10^{-5}$ | <i>HNRNPA3, HNRNPK, HNRNPA2B1, HNRNPD, HNRNPH1, RBMX, HNRNPA1, HNRNPU</i>                                                                |
| substantia nigra development                                       | $5.84 \times 10^{-5}$ | <i>ACTB, CDC42, RHOA, ATP5F1, COX6B1, HSPA5, YWHAE, ATP5J</i>                                                                            |
| actin filament capping                                             | $1.07 \times 10^{-4}$ | <i>GSN, AVIL, SPTBN2, SPTBN1, SPTAN1</i>                                                                                                 |
| oxidative phosphorylation                                          | $1.07 \times 10^{-4}$ | <i>UQCRC2, UQCRC1, UQCRH, ATP5C1, UQCRB</i>                                                                                              |
| actin filament organization                                        | $1.09 \times 10^{-4}$ | <i>INPPL1, FSCN1, TMOD3, ACTN1, TPM2, CTNNA1, TPM1, DBN1, TPM4</i>                                                                       |
| muscle filament sliding                                            | $1.12 \times 10^{-4}$ | <i>MYL6, ACTC1, NEB, VIM, TPM2, TPM1, TPM4</i>                                                                                           |
| membrane raft assembly                                             | $1.63 \times 10^{-4}$ | <i>FLOT2, FLOT1, S100A10, ANXA2</i>                                                                                                      |
| platelet aggregation                                               | $1.74 \times 10^{-4}$ | <i>ACTB, ACTG1, ACTN1, MYL12A, MYH9, HBB, FLNA</i>                                                                                       |
| cell redox homeostasis                                             | $1.76 \times 10^{-4}$ | <i>P4HB, TMX1, PDIA3, AIFM1, DLD, TXN, PDIA6, PRDX3, PRDX1</i>                                                                           |
| translational elongation                                           | $4.22 \times 10^{-4}$ | <i>TUFM, EEF1A1, EEF1G, RPLP2, EEF2</i>                                                                                                  |
| positive regulation of substrate adhesion-dependent cell spreading | $4.48 \times 10^{-4}$ | <i>CDC42, C1QBP, ARPC2, RAC1, S100A10, FLNA</i>                                                                                          |
| ER to Golgi vesicle-mediated transport                             | $4.67 \times 10^{-4}$ | <i>CD55, CD59, ARF4, SPTBN2, TMED10, RAB1B, SPTBN1, LMAN1, NSF, GOLGB1, SPTAN1, BCAP31</i>                                               |
| negative regulation of apoptotic process                           | $4.83 \times 10^{-4}$ | <i>ACTC1, NAA16, PRDX3, FLNA, MIF, ATAD3A, HSP90B1, PA2G4, HNRNPK, RPS3A, ALB, PHB2, CD59, CFL1, NPM1, ARF4, HSPA5, HSPD1, MYO18A,</i>   |

|                                                          |                       |                                                                                                                |
|----------------------------------------------------------|-----------------------|----------------------------------------------------------------------------------------------------------------|
|                                                          |                       | <i>UBA52, DNAJA3, HSPA9</i>                                                                                    |
| small GTPase mediated signal transduction                | $5.73 \times 10^{-4}$ | <i>RAB7A, HACD3, RAN, RAB5C, RAB1B, CDC42, KRAS, ARF4, RAC1, RHOA, RAB11A, RAP1A, RAB6B, RAB6A, DNAJA3</i>     |
| mRNA splicing, via spliceosome                           | $6.86 \times 10^{-4}$ | <i>FUS, HNRNPA2B1, RBMX, HNRNPA1, HNRNPU, PNN, SRSF3, NONO, HNRNPA3, HNRNPK, DHX38, HNRNPD, HNRNPH1, HSPA8</i> |
| nucleosome assembly                                      | $7.67 \times 10^{-4}$ | <i>H1F0, HIST1H1E, HIST1H2BN, HIST1H1D, SET, HIST1H4A, HIST1H1C, CENPA, NPM1, H1FX</i>                         |
| response to endoplasmic reticulum stress                 | $8.57 \times 10^{-4}$ | <i>P4HB, TMX1, HSP90B1, PDIA3, EIF2S1, FLOT1, PDIA6, EEF2</i>                                                  |
| mitochondrion organization                               | $1.00 \times 10^{-3}$ | <i>SSBP1, PHB2, ATP5B, PHB, STOML2, PRDX3, PARP1, DNAJA3</i>                                                   |
| positive regulation of gene expression                   | $1.06 \times 10^{-3}$ | <i>ACTC1, PHB, VIM, RDX, HSPA1B, HNRNPU, RPS3, CDC42, KRAS, EZR, RPS6KA2, GSN, HNRNPD, MSN, ZPRI</i>           |
| actin cytoskeleton organization                          | $1.44 \times 10^{-3}$ | <i>CDC42, KRAS, RAN, FSCN1, CFL1, RAC1, RHOA, TMOD3, FLNB, CAPZB</i>                                           |
| retrograde vesicle-mediated transport, Golgi to ER       | $1.45 \times 10^{-3}$ | <i>ARF4, SURF4, TMED10, RAB1B, RAB6B, RAB6A, BICD2, NSF</i>                                                    |
| establishment of protein localization to plasma membrane | $1.60 \times 10^{-3}$ | <i>JUP, EZR, FLOT2, FLOT1, S100A10, RDX</i>                                                                    |
| canonical glycolysis                                     | $1.81 \times 10^{-3}$ | <i>PKM, TP11, HK1, GAPDH, ENO1</i>                                                                             |
| protein folding in endoplasmic reticulum                 | $2.09 \times 10^{-3}$ | <i>HSP90B1, PDIA3, HSPA5, CANX</i>                                                                             |

|                                                                                          |                       |                                                 |
|------------------------------------------------------------------------------------------|-----------------------|-------------------------------------------------|
| actomyosin structure organization                                                        | 2.09×10 <sup>-3</sup> | <i>EPB41L2, ACTC1, MYH9, MYO18A, MYH10</i>      |
| adenine transport                                                                        | 2.44×10 <sup>-3</sup> | <i>SLC25A5, SLC25A6, VDAC3</i>                  |
| regulation of organelle assembly                                                         | 2.44×10 <sup>-3</sup> | <i>EZR, RDX, MSN</i>                            |
| barbed-end actin filament capping                                                        | 2.62×10 <sup>-3</sup> | <i>GSN, CAPZA1, RDX, CAPZB</i>                  |
| actin cytoskeleton reorganization                                                        | 2.65×10 <sup>-3</sup> | <i>CTTN, EZR, RHOA, SHC1, MYH9, FLNA</i>        |
| actin filament bundle assembly                                                           | 3.11×10 <sup>-3</sup> | <i>CDC42, EZR, ACTN4, FSCN1, ACTN1</i>          |
| regulation of complement activation                                                      | 3.11×10 <sup>-3</sup> | <i>CD55, CIQBP, C4A, PHB2, CD59</i>             |
| protein refolding                                                                        | 3.23×10 <sup>-3</sup> | <i>HSP90AA1, HSPA1B, HSPD1, HSPA8</i>           |
| mitochondrial electron transport, ubiquinol to cytochrome c                              | 3.23×10 <sup>-3</sup> | <i>UQCRC2, UQCRC1, UQCRH, UQCRB</i>             |
| positive regulation of lamellipodium assembly                                            | 3.91×10 <sup>-3</sup> | <i>HSP90AA1, ARPC2, FSCN1, RAC1</i>             |
| establishment of endothelial barrier                                                     | 3.91×10 <sup>-3</sup> | <i>EZR, RAPIA, RDX, MSN</i>                     |
| ATP hydrolysis coupled proton transport                                                  | 3.96×10 <sup>-3</sup> | <i>ATP6AP1, ATP5B, ATP6V0A1, ATP1A1, ATP5A1</i> |
| maturation of SSU-rRNA from tricistronic rRNA transcript (SSU-rRNA, 5.8S rRNA, LSU-rRNA) | 3.96×10 <sup>-3</sup> | <i>RPS19, RPS16, RPS14, RPS8, RPS24</i>         |
| positive regulation of protein localization to early endosome                            | 4.02×10 <sup>-3</sup> | <i>EZR, RDX, MSN</i>                            |
| aerobic respiration                                                                      | 4.43×10 <sup>-3</sup> | <i>UQCRC2, UQCRC1, UQCRH, NDUFV1, UQCRB</i>     |

---

**Table S3. The top 61 most-enriched functions of the genes that have a *P*-value less than 0.05 in the predicted signaling network regulated by DCF1 in HEK293T-blank, where the**



**biological process from Gene Ontology was considered.**

**Table S4**

| Function                                        | P-value               | Genes in the predicted signaling network                  |
|-------------------------------------------------|-----------------------|-----------------------------------------------------------|
| epidermis development                           | $4.75 \times 10^{-7}$ | <i>KRT9, KRT17, KRT5, KRT16, CASP14, KRT14, KRT2, DSP</i> |
| intermediate filament organization              | $1.59 \times 10^{-6}$ | <i>KRT9, KRT17, VIM, KRT2, DSP</i>                        |
| establishment of skin barrier                   | $2.65 \times 10^{-6}$ | <i>HRNR, FLG, KRT16, KRT1, FLG2</i>                       |
| keratinization                                  | $6.99 \times 10^{-6}$ | <i>HRNR, KRT17, KRT16, CASP14, KRT2, TGM3</i>             |
| cytoskeleton organization                       | $3.33 \times 10^{-5}$ | <i>ACTB, TUBA8, KRT6B, KRT5, APOE, KRT16, MSN, DST</i>    |
| keratinocyte differentiation                    | $6.67 \times 10^{-5}$ | <i>FLG, KRT16, DSP, TGM3, KRT10, CSTA</i>                 |
| intermediate filament cytoskeleton organization | $7.36 \times 10^{-5}$ | <i>KRT6C, KRT6A, KRT16, DST</i>                           |
| cellular oxidant detoxification                 | $6.37 \times 10^{-4}$ | <i>APOE, ALB, TXN, HBA1, HBB</i>                          |
| mitochondrion organization                      | $9.12 \times 10^{-4}$ | <i>SSBP1, PHB2, ATP5B, PHB, PARP1</i>                     |
| protein stabilization                           | $9.98 \times 10^{-4}$ | <i>LAMP1, PHB2, PHB, DSG1, HSPD1, GAPDH</i>               |
| movement of cell or subcellular component       | $1.38 \times 10^{-3}$ | <i>ACTB, TUBB, VIM, TXN, MSN</i>                          |
| retina homeostasis                              | $1.44 \times 10^{-3}$ | <i>ACTB, AZGP1, ALB, KRT1</i>                             |

|                                                                     |                       |                                                        |
|---------------------------------------------------------------------|-----------------------|--------------------------------------------------------|
| SRP-dependent cotranslational protein targeting to membrane         | $1.91 \times 10^{-3}$ | <i>RPL7, RPL15, FAU, RPS2, RPL29</i>                   |
| hemidesmosome assembly                                              | $1.97 \times 10^{-3}$ | <i>KRT5, KRT14, DST</i>                                |
| single organismal cell-cell adhesion                                | $2.48 \times 10^{-3}$ | <i>JUP, DSG1, DSP, SHC1, CSTA</i>                      |
| anion transport                                                     | $2.70 \times 10^{-3}$ | <i>VDAC2, VDAC3, VDAC1</i>                             |
| translation                                                         | $2.97 \times 10^{-3}$ | <i>RPL7, SLC25A5, RPL15, SLC25A3, FAU, RPS2, RPL29</i> |
| viral transcription                                                 | $3.61 \times 10^{-3}$ | <i>RPL7, RPL15, FAU, RPS2, RPL29</i>                   |
| regulation of anion transmembrane transport                         | $3.99 \times 10^{-3}$ | <i>VDAC2, VDAC3, VDAC1</i>                             |
| cell-cell adhesion                                                  | $4.16 \times 10^{-3}$ | <i>BSG, FSCN1, RPL15, RPS2, DBN1, ANXA2, RPL29</i>     |
| nuclear-transcribed mRNA catabolic process, nonsense-mediated decay | $4.48 \times 10^{-3}$ | <i>RPL7, RPL15, FAU, RPS2, RPL29</i>                   |
| translational initiation                                            | $7.34 \times 10^{-3}$ | <i>RPL7, RPL15, FAU, RPS2, RPL29</i>                   |
| cytoplasmic translation                                             | $8.55 \times 10^{-3}$ | <i>RPL7, RPL15, RPL29</i>                              |
| positive regulation of cell death                                   | $1.14 \times 10^{-2}$ | <i>PHB, HBA1, HBB</i>                                  |
| ATP biosynthetic process                                            | $1.14 \times 10^{-2}$ | <i>LDHC, ATP5B, ATP5A1</i>                             |
| positive regulation of gene expression                              | $1.59 \times 10^{-2}$ | <i>APOB, ACTA1, PHB, VIM, ZP1, MSN</i>                 |
| regulation of heart rate by cardiac conduction                      | $1.64 \times 10^{-2}$ | <i>JUP, DSP, AKAP9</i>                                 |
| cell envelope organization                                          | $1.67 \times 10^{-2}$ | <i>HRNR, TGM3</i>                                      |
| muscle filament sliding                                             | $1.91 \times 10^{-2}$ | <i>MYL6, ACTA1, VIM</i>                                |
| lipoprotein metabolic process                                       | $1.91 \times 10^{-2}$ | <i>APOB, APOE, ALB</i>                                 |

|                                     |                       |                                      |
|-------------------------------------|-----------------------|--------------------------------------|
| receptor-mediated endocytosis       | $2.05 \times 10^{-2}$ | <i>APOB, APOE, ALB, HBA1, HBB</i>    |
| lipoprotein catabolic process       | $2.22 \times 10^{-2}$ | <i>APOB, APOE</i>                    |
| adenine transport                   | $2.22 \times 10^{-2}$ | <i>SLC25A5, VDACC3</i>               |
| keratinocyte migration              | $2.77 \times 10^{-2}$ | <i>KRT16, KRT2</i>                   |
| leukocyte migration                 | $3.11 \times 10^{-2}$ | <i>APOB, BSG, SHC1, MSN</i>          |
| peptide cross-linking               | $3.19 \times 10^{-2}$ | <i>DSP, TGM3, CSTA</i>               |
| rRNA processing                     | $3.22 \times 10^{-2}$ | <i>RPL7, RPL15, FAU, RPS2, RPL29</i> |
| response to hydrogen peroxide       | $3.31 \times 10^{-2}$ | <i>HSPD1, HBA1, HBB</i>              |
| bundle of His cell-Purkinje myocyte |                       |                                      |
| adhesion involved in cell           | $3.31 \times 10^{-2}$ | <i>JUP, DSP</i>                      |
| communication                       |                       |                                      |
| lipoprotein biosynthetic process    | $4.93 \times 10^{-2}$ | <i>APOB, APOE</i>                    |

**Table S4. The top 40 most-enriched functions of the genes that have a *P*-value less than 0.05 in the predicted signaling network regulated by DCF1 in HEK293T-TAT-DCF1, where the biological process from Gene Ontology was considered.**

**Table S5**

| Function                           | <i>P</i> -value       | Genes in the predicted signaling network       |
|------------------------------------|-----------------------|------------------------------------------------|
| intermediate filament organization | $1.02 \times 10^{-3}$ | <i>KRT9, VIM, KRT2</i>                         |
| viral process                      | $1.90 \times 10^{-3}$ | <i>SLC25A5, KRT8, VIM, SHC1, HSPD1, VDACC1</i> |

|                                                                     |                       |                                            |
|---------------------------------------------------------------------|-----------------------|--------------------------------------------|
| epidermis development                                               | $2.07 \times 10^{-3}$ | <i>KRT9, KRT5, KRT16, KRT2</i>             |
| SRP-dependent cotranslational protein targeting to membrane         | $2.75 \times 10^{-3}$ | <i>RPL18, RPL14, RPL15, RPL29</i>          |
| viral transcription                                                 | $4.51 \times 10^{-3}$ | <i>RPL18, RPL14, RPL15, RPL29</i>          |
| nuclear-transcribed mRNA catabolic process, nonsense-mediated decay | $5.34 \times 10^{-3}$ | <i>RPL18, RPL14, RPL15, RPL29</i>          |
| retina homeostasis                                                  | $6.31 \times 10^{-3}$ | <i>ACTG1, ALB, KRT1</i>                    |
| translation                                                         | $6.73 \times 10^{-3}$ | <i>RPL18, RPL14, SLC25A5, RPL15, RPL29</i> |
| protein stabilization                                               | $7.72 \times 10^{-3}$ | <i>PPIB, NAA16, HSPD1, GAPDH</i>           |
| translational initiation                                            | $7.87 \times 10^{-3}$ | <i>RPL18, RPL14, RPL15, RPL29</i>          |
| keratinocyte migration                                              | $1.48 \times 10^{-2}$ | <i>KRT16, KRT2</i>                         |
| membrane raft assembly                                              | $1.77 \times 10^{-2}$ | <i>FLOT1, ANXA2</i>                        |
| rRNA processing                                                     | $2.58 \times 10^{-2}$ | <i>RPL18, RPL14, RPL15, RPL29</i>          |
| chaperone mediated protein folding requiring cofactor               | $2.94 \times 10^{-2}$ | <i>HSPE1, HSPD1</i>                        |
| hemidesmosome assembly                                              | $3.52 \times 10^{-2}$ | <i>KRT5, DST</i>                           |
| anion transport                                                     | $4.09 \times 10^{-2}$ | <i>VDAC2, VDAC1</i>                        |
| intermediate filament cytoskeleton organization                     | $4.38 \times 10^{-2}$ | <i>KRT16, DST</i>                          |
| cell-cell adhesion                                                  | $4.68 \times 10^{-2}$ | <i>RPL14, RPL15, RPL29, ANXA2</i>          |
| regulation of anion transmembrane transport                         | $4.95 \times 10^{-2}$ | <i>VDAC2, VDAC1</i>                        |

---

**Table S5. The top 19 most-enriched functions of the genes that have a *P*-value less than 0.05 in the predicted signaling network regulated by DCF1 in U251-blank, where the biological**

process from Gene Ontology was considered.

**Table S6**

| Function                                                            | <i>P</i> -value       | Genes in the predicted signaling network                               |
|---------------------------------------------------------------------|-----------------------|------------------------------------------------------------------------|
| SRP-dependent cotranslational protein targeting to membrane         | $3.89 \times 10^{-5}$ | <i>RPL23, RPL14, RPL4, RPL28, RPS27A, RPS8, RPL29</i>                  |
| viral transcription                                                 | $1.04 \times 10^{-4}$ | <i>RPL23, RPL14, RPL4, RPL28, RPS27A, RPS8, RPL29</i>                  |
| nuclear-transcribed mRNA catabolic process, nonsense-mediated decay | $1.45 \times 10^{-4}$ | <i>RPL23, RPL14, RPL4, RPL28, RPS27A, RPS8, RPL29</i>                  |
| translation                                                         | $2.93 \times 10^{-4}$ | <i>SLC25A31, RPL23, RPL14, RRBP1, RPL4, RPL28, RPS27A, RPS8, RPL29</i> |
| translational initiation                                            | $3.11 \times 10^{-4}$ | <i>RPL23, RPL14, RPL4, RPL28, RPS27A, RPS8, RPL29</i>                  |
| rRNA processing                                                     | $5.79 \times 10^{-4}$ | <i>RPL23, RPL14, RIOK3, RPL4, RPL28, RPS27A, RPS8, RPL29</i>           |
| DNA topological change                                              | $1.54 \times 10^{-3}$ | <i>HMGB1, HMGB2, TOP2A</i>                                             |
| V(D)J recombination                                                 | $1.92 \times 10^{-3}$ | <i>HMGB1, HMGB2, LIG1</i>                                              |
| DNA ligation involved in DNA repair                                 | $1.92 \times 10^{-3}$ | <i>HMGB1, HMGB2, LIG1</i>                                              |
| establishment of protein localization to plasma membrane            | $2.74 \times 10^{-3}$ | <i>ROCK1, FLOT2, SPTBN4, FLOT1</i>                                     |

|                                                         |                       |                                   |
|---------------------------------------------------------|-----------------------|-----------------------------------|
| apoptotic DNA fragmentation                             | 4.37×10 <sup>-3</sup> | <i>HMGB1, HMGB2, KPNB1</i>        |
| intermediate filament organization                      | 4.98×10 <sup>-3</sup> | <i>KRT9, VIM, KRT2</i>            |
| microtubule cytoskeleton organization                   | 1.19×10 <sup>-2</sup> | <i>SON, MAPT, PAFAH1B1, GAPDH</i> |
| positive regulation of interferon-beta production       | 1.39×10 <sup>-2</sup> | <i>HMGB1, HMGB2, FLOT1</i>        |
| adult walking behavior                                  | 1.81×10 <sup>-2</sup> | <i>EFNB3, MAPT, SPTBN4</i>        |
| DNA geometric change                                    | 2.64×10 <sup>-2</sup> | <i>HMGB1, HMGB2</i>               |
| negative regulation of cholesterol biosynthetic process | 3.29×10 <sup>-2</sup> | <i>ERLIN1, SCAP</i>               |
| neuron migration                                        | 3.32×10 <sup>-2</sup> | <i>NDE1, MAPT, DNER, PAFAH1B1</i> |
| membrane raft assembly                                  | 3.94×10 <sup>-2</sup> | <i>FLOT2, FLOT1</i>               |
| regulation of circadian rhythm                          | 4.23×10 <sup>-2</sup> | <i>MAPK10, TOP2A, FBXL3</i>       |
| SREBP signaling pathway                                 | 4.58×10 <sup>-2</sup> | <i>ERLIN1, SCAP</i>               |
| regulation of microtubule motor activity                | 4.58×10 <sup>-2</sup> | <i>NDE1, PAFAH1B1</i>             |

---

**Table S6. The top 22 most-enriched functions of the genes that have a *P*-value less than 0.05 in the predicted signaling network regulated by DCF1 in U251-TAT-DCF1, where the biological process from Gene Ontology was considered.**

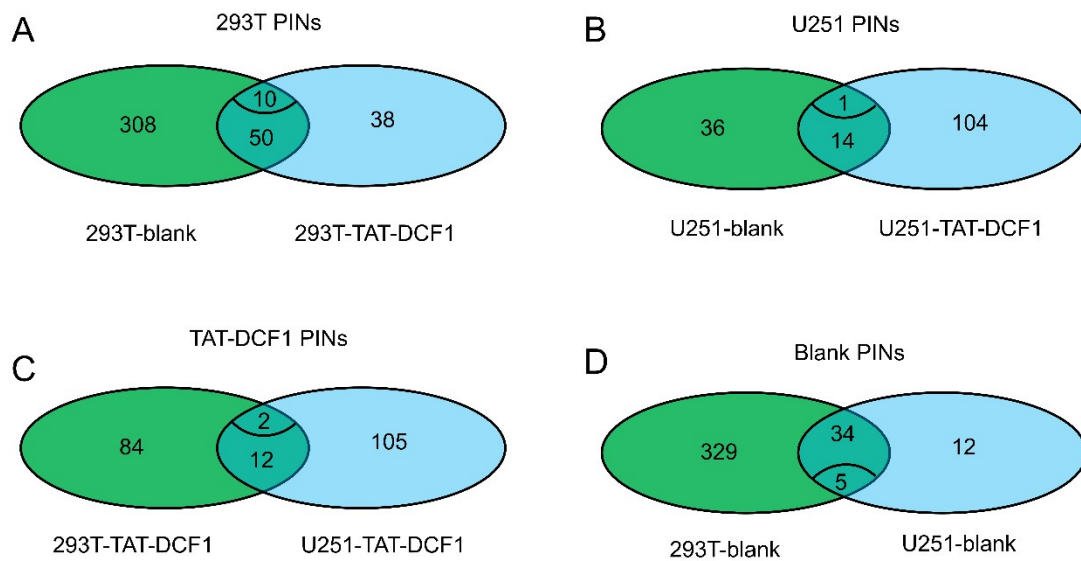

**Figure S1.** Protein numbers in PINs. The connected PINs were constructed based on the STRING database. HEK293T-blank, HEK293T-TAT-DCF1, U251-blank, and U251-TAT-DCF1 involved 368, 98, 51, and 119 proteins, respectively, among which the D values greater than 0.4 were selected and recognized as proteins with significant changes, which were 10, 1, 2, and 34, respectively.

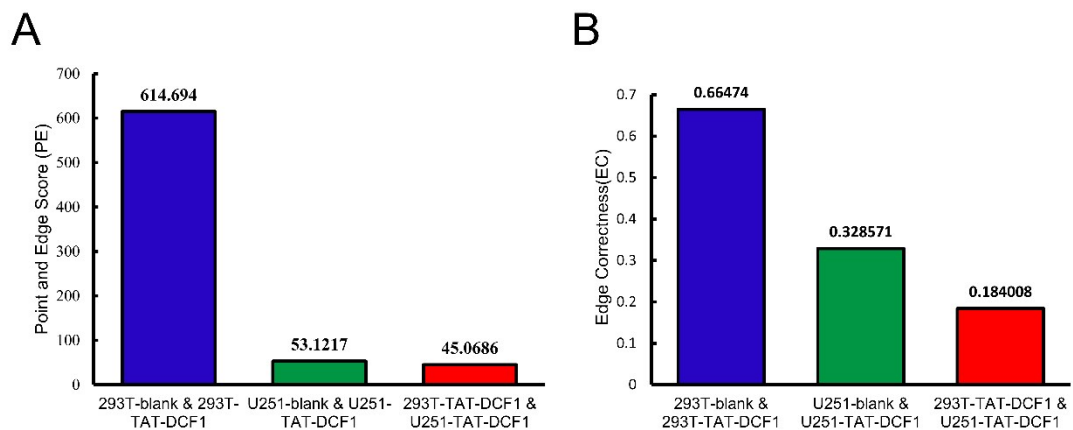

**Figure S2.** The PES and EC of the protein-protein interaction network.

Figure S3

A

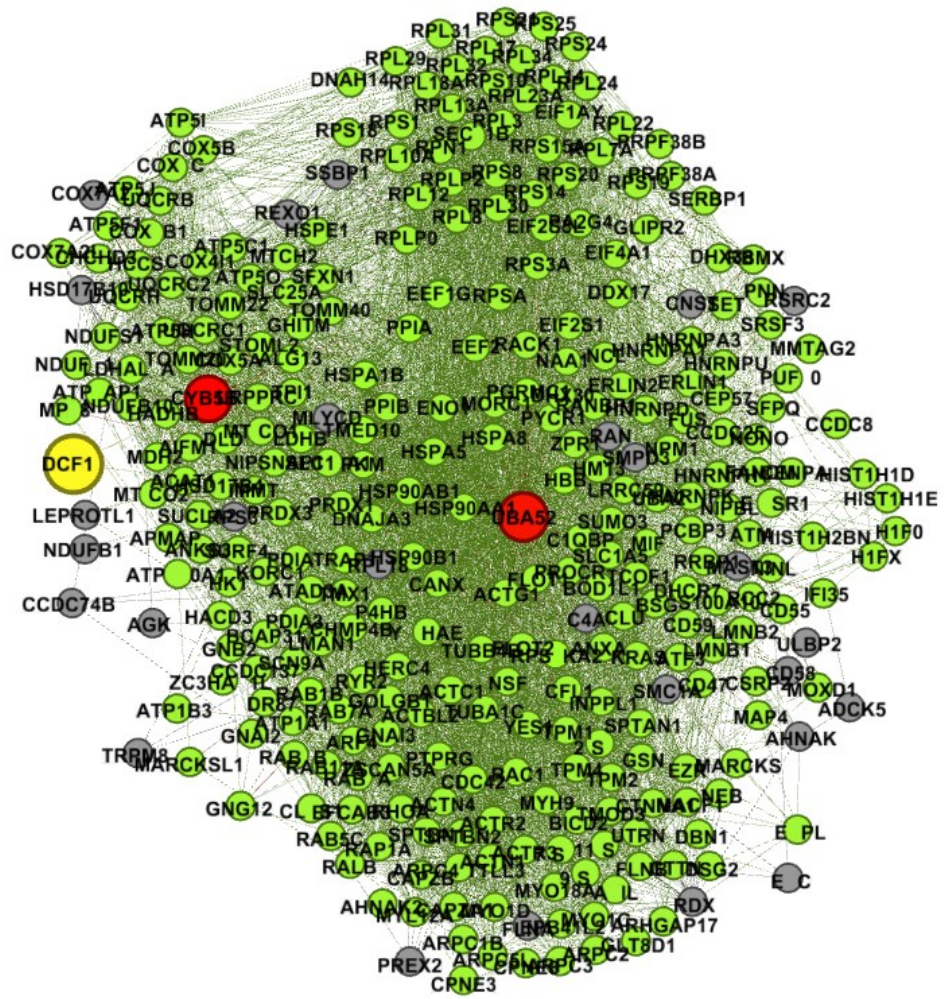

HEK293T-blank (318)

B



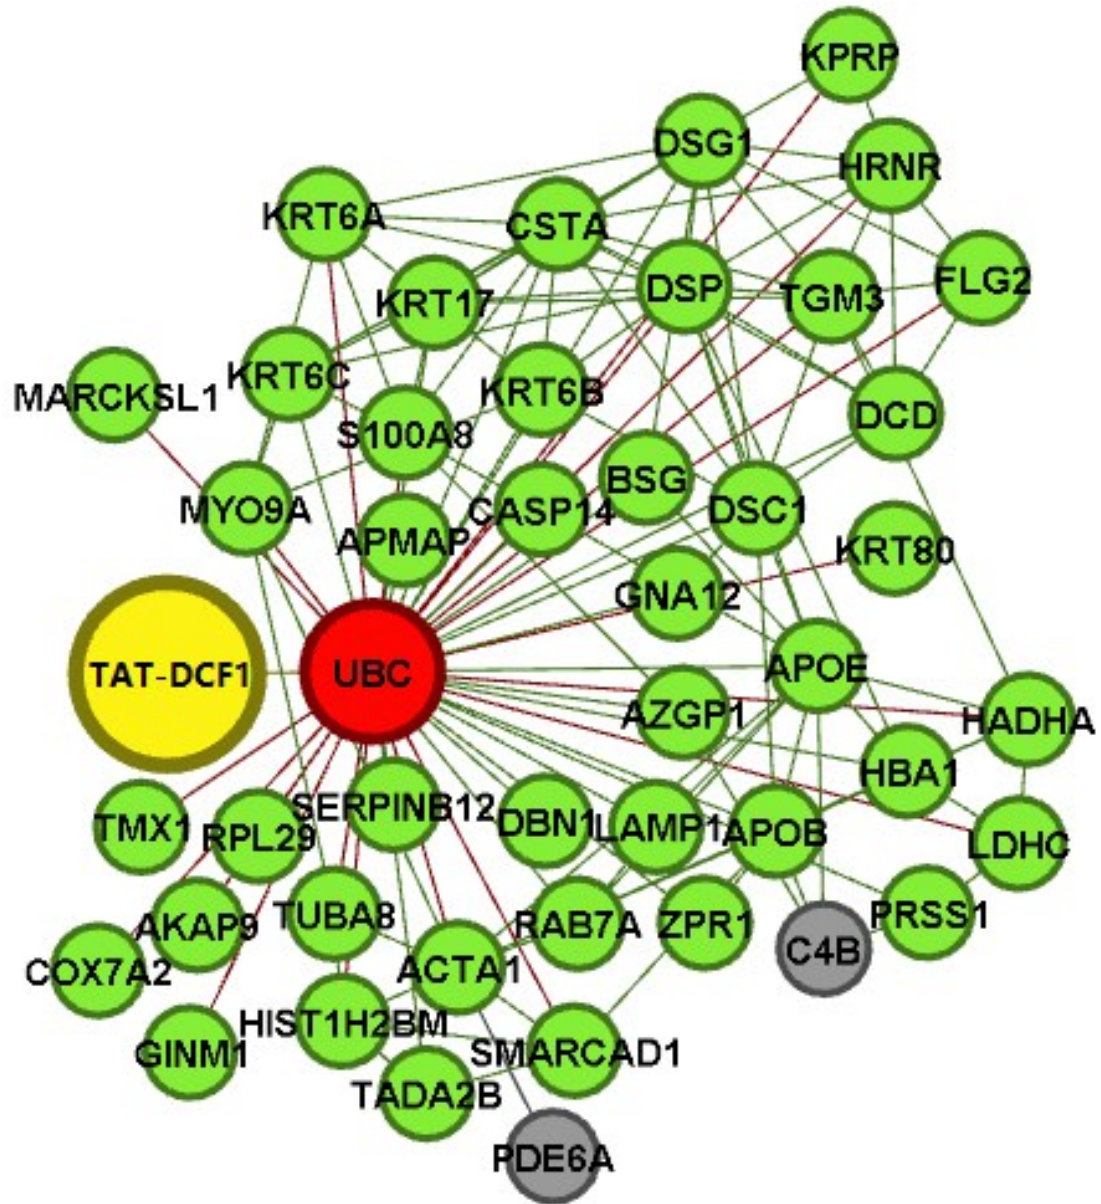

HEK293T-TAT-DCF1 (48)

C

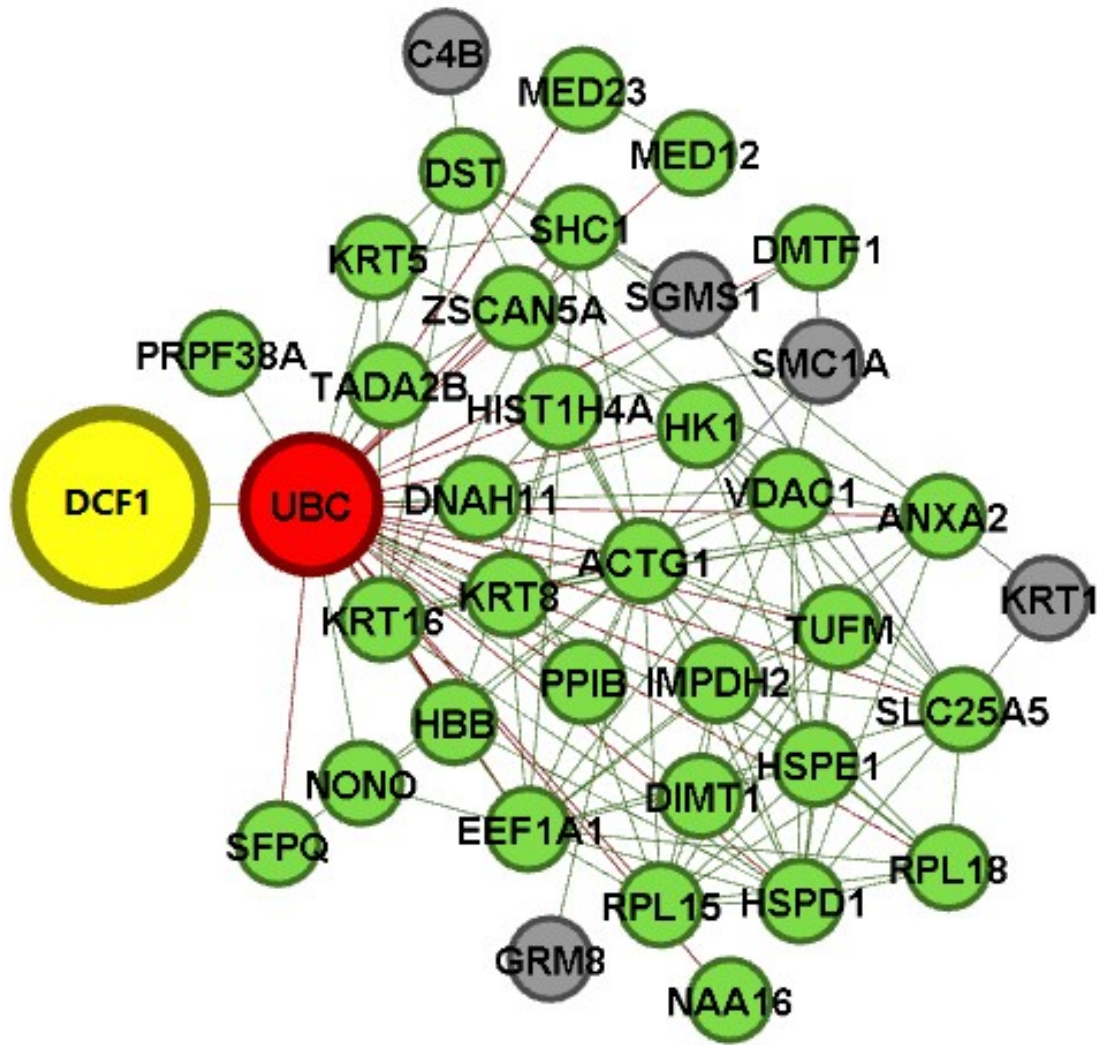

U251-blank (37)

D

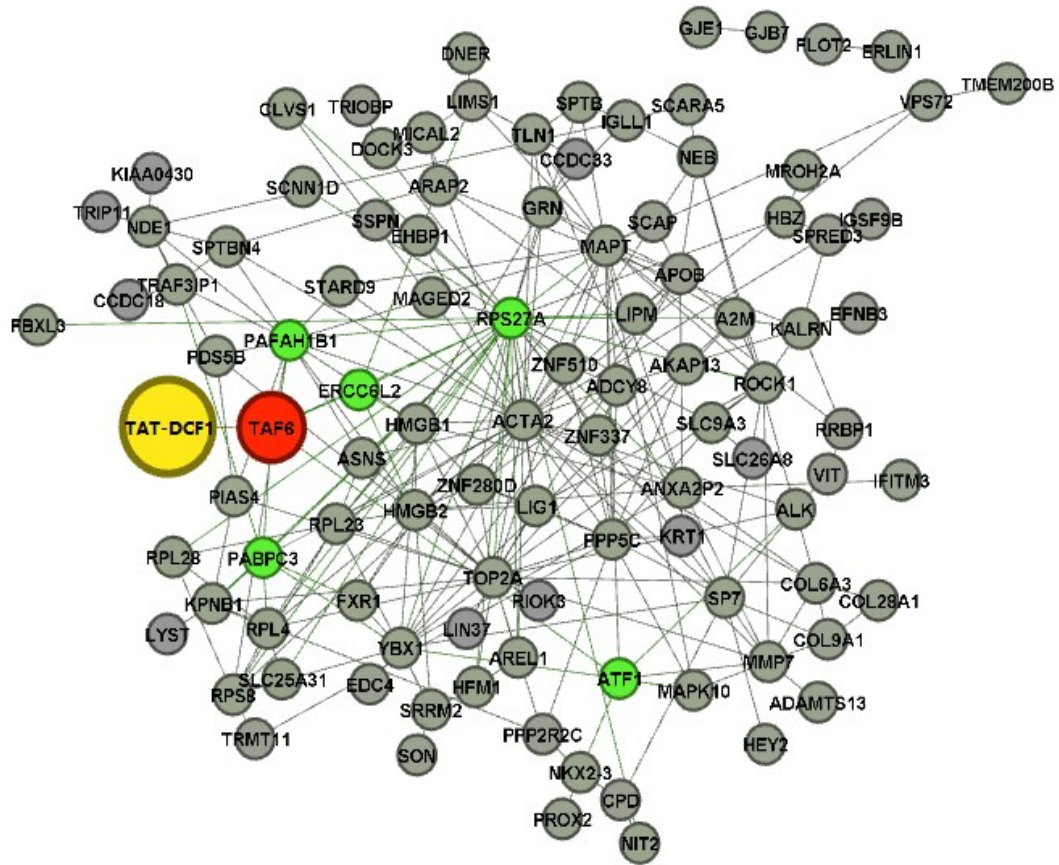

U251-TAT-DCF1 (105)

E



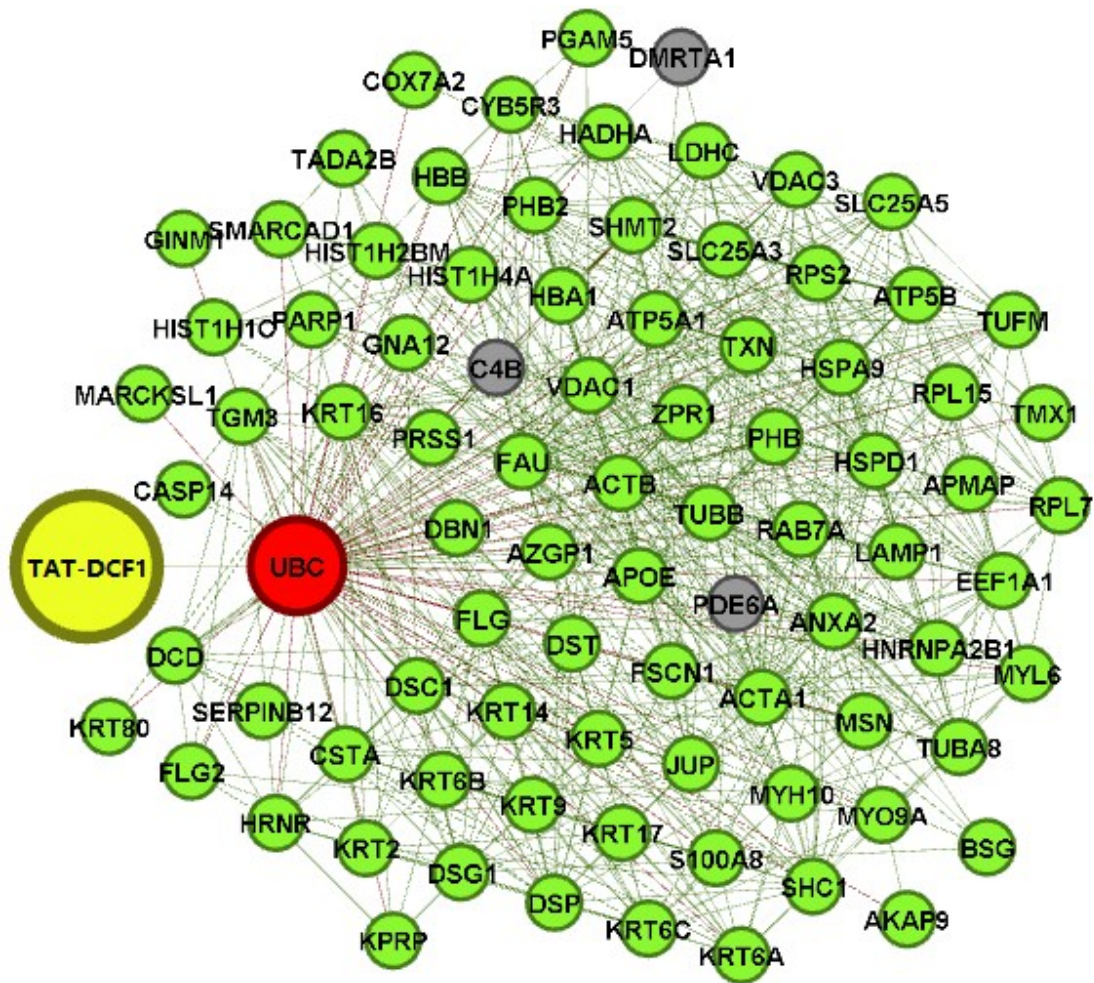

HEK293T-TAT-DCF1 (86)

F

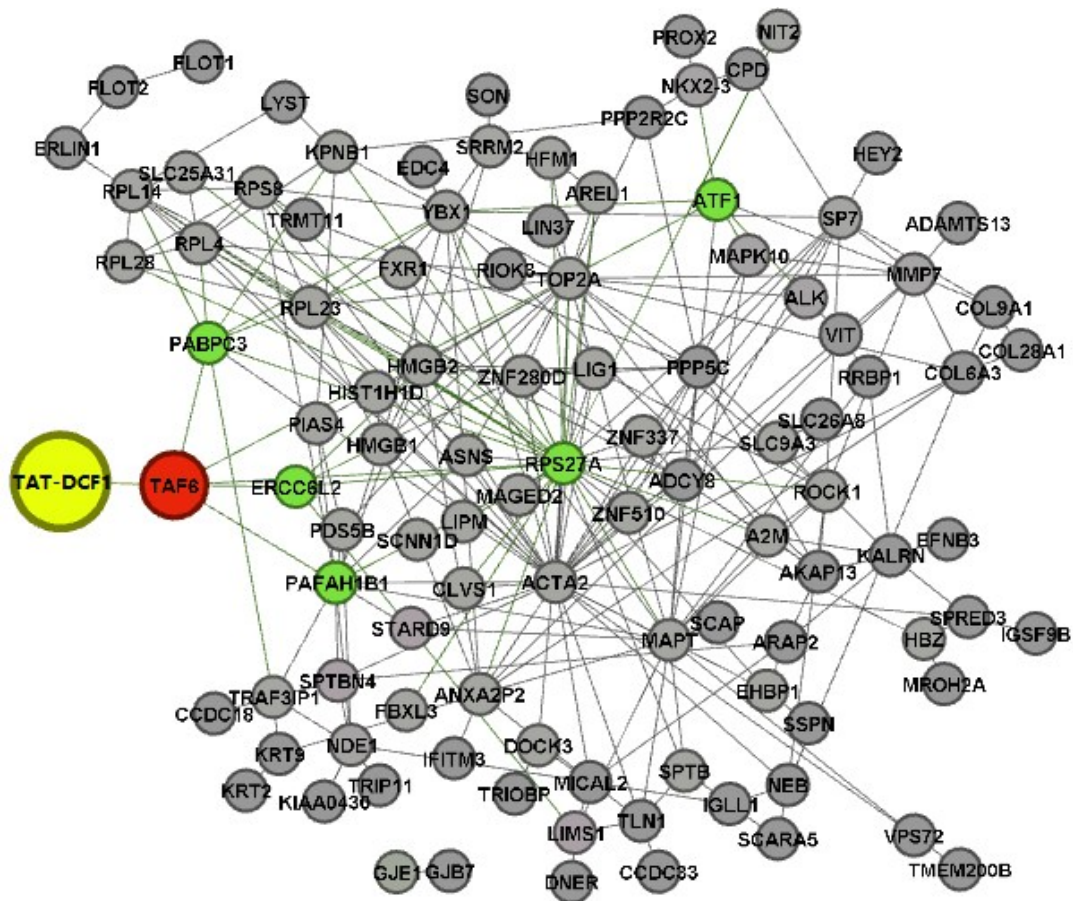

U251-TAT-DCF1 (107)

Figure S3 Protein interaction networks induced by the TAT-DCF1 peptide in U251 and HEK293T cells. Networks were constructed through pairwise comparison between HEK293T-blank (318) (A) and HEK293T-TAT-DCF1 (48) (B) U251-blank (37) (C) and U251-TAT-DCF1 (105) (D), HEK293T-TAT-DCF1(86) (E) and U251-TAT-DCF1(107) (F). The red nodes denote the genes that directly interact with the yellow nodes, and the green nodes denote the genes that directly interact with the red nodes.
